10. GraphPad Software. Frequently Asked Questions. Available at: <http://www.graphpad.com/support/faqid/901/>. Accessed May 19, 2017
11. Motulsky HJ, Christopoulos A: Fitting Models to Biological Data Using Linear and Nonlinear Regression: A Practical Guide to Curve Fitting. San Diego, GraphPad Software Inc, 2003, pp. 256–65
12. Sjöberg T, Norgren L, Andersson KE, Steen S: Comparative effects of the alpha-adrenoceptor agonists noradrenaline, phenylephrine and clonidine in the human saphenous vein *in vivo* and *in vitro*. *Acta Physiol Scand* 1989; 136:463–71
13. Smiley RM: More perfect? *Int J Obstet Anesth* 2017; 29:1–4
14. Ngan Kee WD: Norepinephrine for maintaining blood pressure during spinal anaesthesia for caesarean section: A 12-month review of individual use. *Int J Obstet Anesth* 2017; 30:73–4
15. Ngan Kee WD: The use of vasopressors during spinal anaesthesia for caesarean section. *Curr Opin Anaesthesiol* 2017; 30:319–25
16. Ngan Kee WD, Khaw KS, Tan PE, Ng FF, Karmakar MK: Placental transfer and fetal metabolic effects of phenylephrine and ephedrine during spinal anaesthesia for caesarean delivery. *ANESTHESIOLOGY* 2009; 111:506–12
17. Carvalho B, Dyer RA: Norepinephrine for spinal hypotension during cesarean delivery: Another paradigm shift? *ANESTHESIOLOGY* 2015; 122:728–30
18. Ngan Kee WD, Khaw KS, Lau TK, Ng FF, Chui K, Ng KL: Randomised double-blinded comparison of phenylephrine vs ephedrine for maintaining blood pressure during spinal anaesthesia for non-elective Caesarean section. *Anaesthesia* 2008; 63:1319–26

## ANESTHESIOLOGY REFLECTIONS FROM THE WOOD LIBRARY-MUSEUM

### Brown Describes Bolivian Coca-Leaf Chewing: A Remedy Gathered *versus* Altitude and Attitude?

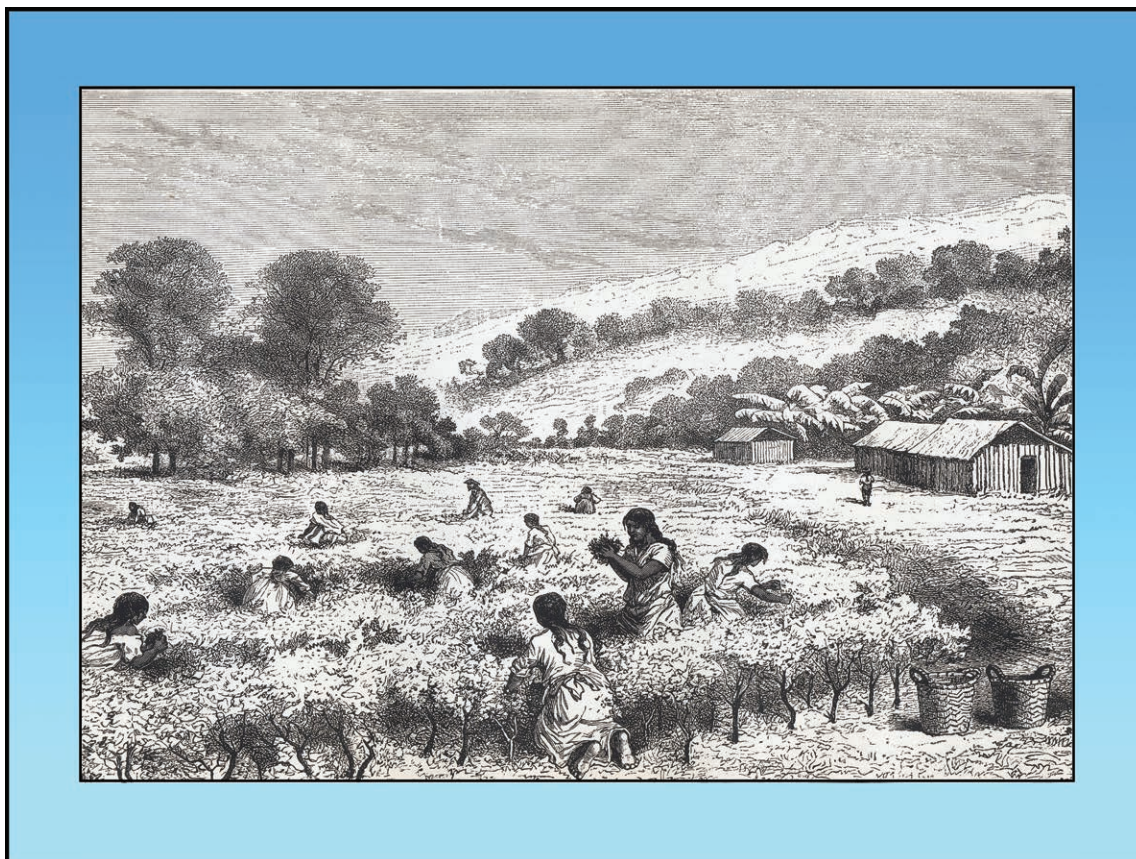

In 1876 author Robert Brown, Ph.D., began publishing his book series, *The Countries of the World: Being a Popular Description of the Various Continents, Islands, Rivers, Seas, and Peoples of the Globe*. In the third volume, he depicted the coca shrub, the pesticide-like cocaine of which wards off insects. However, the stimulant properties of the cocaine alkaloid led to what Brown captioned as “Gathering the Coca Plant (*Erythroxylon coca*) in Bolivia” (above). As landlocked descendants of the Incans, many indigenous Bolivians kept laboring on the steep Andes or on the highland plateau by carrying a “little leathern bag of the dried [coca] leaves, and a gourd of powdered [quick]lime.” According to Brown, the coca leaves were “chewed four times a day, mixed, either with the powdered lime, or with the ashes of *Cecropia*, or quinoa.” Cheekfuls of coca leaves provided trace amounts of cocaine, which were prized as an appetite-suppressing and energizing remedy against the altitudinal lows (fatigue) and perhaps the altitudinal heights. (Copyright © the American Society of Anesthesiologists’ Wood Library-Museum of Anesthesiology.)

George S. Bause, M.D., M.P.H., Honorary Curator and Laureate of the History of Anesthesia, Wood Library-Museum of Anesthesiology, Schaumburg, Illinois, and Clinical Associate Professor, Case Western Reserve University, Cleveland, Ohio. [UJYC@aol.com](mailto:UJYC@aol.com).
